# Postintubation Tracheal Rupture Detected by Virtual Endoscopy and Curved Planar Reformation

Rui Zhu, M.B., Feifei Lang, M.B., Ming Li, M.D., Ph.D., Weidong Gu, M.D., Ph.D.

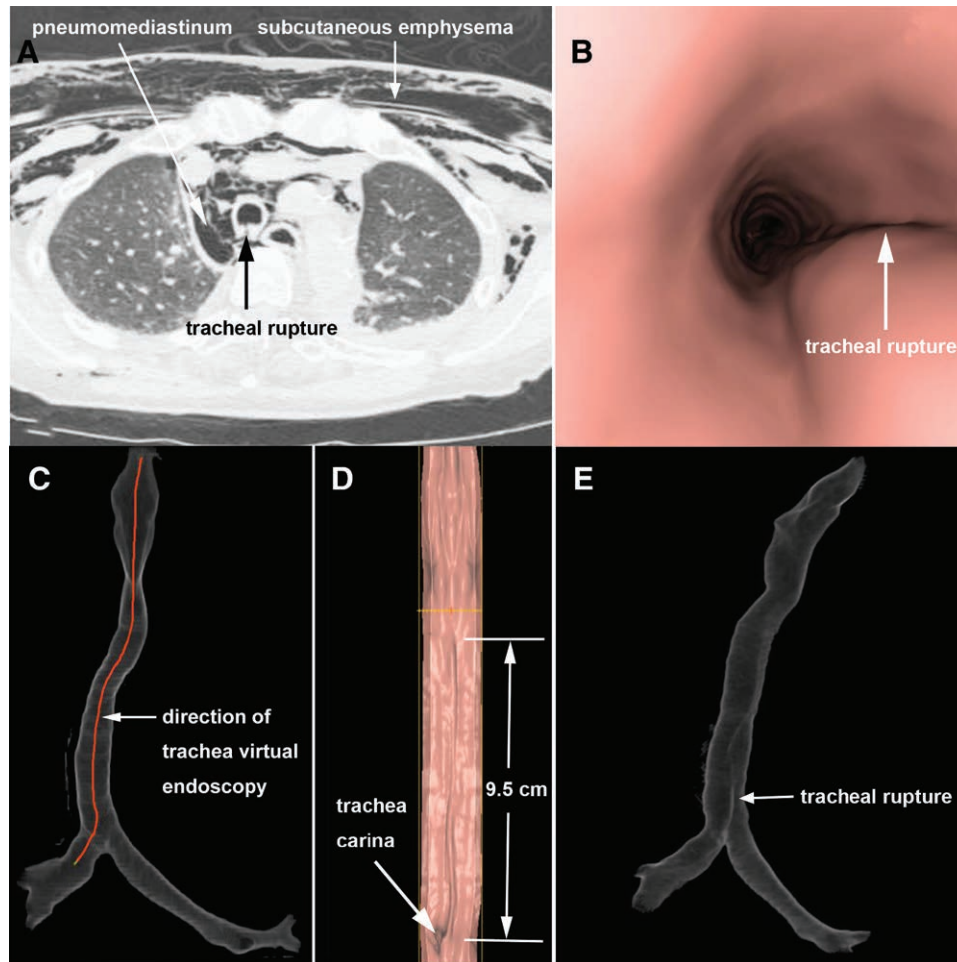

Postintubation tracheal rupture represents a life-threatening condition requiring prompt diagnosis and treatment. Common computed tomography findings of postintubation tracheal rupture include subcutaneous emphysema and pneumomediastinum (*image A*). New techniques, including virtual endoscopy, curved planar reformation, and minimum intensity projection, greatly contribute to judging the location and length of tracheal tear.

Virtual endoscopy uses multidetector computed tomography data to display intraluminal geography of the airway in a noninvasive way<sup>1</sup> (*image B* and *C*). Curved planar

reformation is a type of multiple planar reconstruction accomplished by aligning the long axis of the imaging plane with a specific anatomic structure, such as trachea (*image D*). Minimum intensity projection is a multiplanar slab image generated by displaying only the lowest attenuation value encountered along a ray cast through an object toward viewer's eye (*image E*). The combination of traditional computed tomography with virtual endoscopy, curved planar reformation, and minimum intensity projection could complement each other to display two-dimensional, three-dimensional, and endoluminal structures of the trachea, and provides crucial information for clinical treatment.

Published online first on September 18, 2019. From the Departments of Anesthesiology (R.Z., F.L., W.G.) and Radiology (M.L.), Huadong Hospital, Fudan University, Shanghai, China; and Shanghai Key Laboratory of Clinical Geriatric Medicine, Shanghai, China (R.Z., F.L., W.G.).

Copyright © 2020, the American Society of Anesthesiologists, Inc. All Rights Reserved. *Anesthesiology* 2020; 132:375–6. DOI: 10.1097/ALN.0000000000002994

The treatment decision for postintubation tracheal rupture depends on the tear size, the location, and the patient's respiratory status. In stable patients with spontaneous breathing, conservative management, including antibiotic prophylaxis, antitussive agents, and chest tube insertion if required, is considered sufficient.<sup>2</sup> If mechanical ventilation is required, positioning the tracheal tube distal to tracheal rupture is effective in patients with lacerations in the upper trachea. In cases of mechanically ventilated patients with lacerations close to the carina, early tracheostomy allows spontaneous breathing with the aid of lower positive inspiratory pressure.<sup>3</sup> Surgical operation is mandatory in cases of a large tear with significant air leak and patient instability.

### Competing Interests

The authors declare no competing interests.

### Correspondence

Address correspondence to Dr. Gu: hdmz0800@163.com

### References

1. El-Boghdady K, Onwochei DN, Millhoff B, Ahmad I: The effect of virtual endoscopy on diagnostic accuracy and airway management strategies in patients with head and neck pathology: A prospective cohort study. *Can J Anaesth* 2017; 64:1101–10
2. Conti M, Pougéoise M, Wurtz A, Porte H, Fourrier F, Ramon P, Marquette CH: Management of postintubation tracheobronchial ruptures. *Chest* 2006; 130:412–8
3. Wallet F, Schoeffler M, Duperré S, Robert MO, Workineh S, Viale JP: Management of low tracheal rupture in patients requiring mechanical ventilation for acute respiratory distress syndrome. *ANESTHESIOLOGY* 2008; 108:159–62
